1 **Genome-wide identification of genes important for growth of *Dickeya dadantii***  
2 **and *D. dianthicola* in potato (*Solanum tuberosum*) tubers**

3  
4 Tyler C. Helmann<sup>1</sup>, Melanie J. Filiatrault<sup>1,2</sup>, and Paul V. Stodghill<sup>1,2,\*</sup>.

5  
6 <sup>1</sup>Emerging Pests and Pathogens Research Unit, Robert W. Holley Center for Agriculture and  
7 Health, Agricultural Research Service, United States Department of Agriculture, Ithaca, New  
8 York, USA

9  
10 <sup>2</sup>School of Integrative Plant Science, Plant Pathology and Plant-Microbe Biology Section,  
11 Cornell University, Ithaca, New York, USA

12  
13 **\* Correspondence:**

14 Paul Stodghill  
15 paul.stodghill@usda.gov

16  
17 **ORCID**

18 Tyler C. Helmann, 0000-0002-8431-6461  
19 Melanie J. Filiatrault, 0000-0001-7704-9097  
20 Paul V. Stodghill, 0000-0003-3875-8450

21  
22 **Keywords: potato, soft rot, RB-TnSeq, TnSeq, *Dickeya dadantii*, *Dickeya dianthicola***

23  
24 Abstract word count: 184

25 Word count: 4,238

26 Figures: 7

27 Tables: 1

## 28 Abstract

29 *Dickeya* species are causal agents of soft rot diseases in many economically important  
30 crops, including soft rot disease of potato (*Solanum tuberosum*). Using random barcode  
31 transposon-site sequencing (RB-TnSeq), we generated genome-wide mutant fitness profiles of  
32 *Dickeya dadantii* 3937, *Dickeya dianthicola* ME23, and *Dickeya dianthicola* 67-19 isolates  
33 collected after passage through several *in vitro* and *in vivo* conditions. Tubers from the potato  
34 cultivars “Atlantic”, “Dark Red Norland”, and “Upstate Abundance” provided highly similar  
35 conditions for bacterial growth. Using the homolog detection software PyParanoid, we matched  
36 fitness values for orthologous genes in the three bacterial strains. Direct comparison of fitness  
37 among the strains highlighted shared and variable traits important for growth. Bacterial growth in  
38 minimal medium required many metabolic traits that were also essential for competitive growth  
39 *in planta*, such as amino acid, carbohydrate, and nucleotide biosynthesis. Growth in tubers  
40 specifically required the pectin degradation gene *kduD*. Disruption in three putative DNA-  
41 binding proteins had strain-specific effects on competitive fitness in tubers. Though the Soft Rot  
42 *Pectobacteriaceae* can cause disease with little host specificity, it remains to be seen the extent  
43 to which strain-level variation impacts virulence.

## 45 Introduction

46 The Soft Rot *Pectobacteriaceae* comprise *Dickeya* and *Pectobacterium* species that are  
47 the causal agents of bacterial soft rot diseases on economically-important vegetables and  
48 ornamentals (Adeolu et al., 2016; Motyka et al., 2017). These necrotrophic pathogens rely on  
49 plant cell wall degrading enzymes (PCWDEs) to form visible symptoms, as well as numerous  
50 traits to survive conditions encountered in the host such as oxidative stress, osmotic stress, iron  
51 starvation, and toxic compounds (Jiang et al., 2016; Reverchon et al., 2016). The taxonomy  
52 within these genera has undergone substantial revision with the addition of novel species *D.*  
53 *solani*, *D. aquatica*, and *D. fangzhongdai* (Samson et al., 2005; Parkinson et al., 2014; Wolf et  
54 al., 2014; Tian et al., 2016). However, an increase in available whole-genome sequence data has  
55 improved species-level identification based on pairwise average nucleotide identity (ANI), *in*  
56 *silico* DNA-DNA hybridization (*is*DDH), and core genome multilocus sequence analysis  
57 (MLSA) (Zhang et al., 2016). There is little known about host-specific traits, as these species  
58 generally have broad host ranges (Van Gijsegem et al., 2021). In addition, there are no known  
59 resistance genes for potato soft rot, and it is therefore impossible to predict cultivar resistance  
60 without testing (Lyon, 1989; Czajkowski et al., 2011; Chung et al., 2013). Without gene-for-gene  
61 resistance, potato cultivar tolerance is reliant on physical barriers and antimicrobial small  
62 molecules such as phenolics or the phytoalexin rishitin (Lyon, 1989). An alternative strategy  
63 being explored is the use of bacteriophage-based biocontrol for potato plants and tubers,  
64 particularly of the highly-virulent *D. solani* (Adriaenssens et al., 2012; Czajkowski et al., 2017).

65 *Dickeya* virulence factors and transcriptional regulators of virulence genes are generally  
66 conserved. Studies in *D. solani* have suggested a closed pangenome with many conserved  
67 virulence factors and transcriptional regulators (Golanowska et al., 2018; Motyka-Pomagruk et  
68 al., 2020). However, virulence regulon differences indicate some virulence genes could have  
69 differential expression among strains (Golanowska et al., 2018). Pangenomic analysis of *D.*  
70 *dianthicola* also reflects a closed pangenome, though almost all sequenced strains were  
71 originally isolated from potato (Ge et al., 2021b).

72 To identify bacterial traits important for growth in potato (*Solanum tuberosum*) tubers,  
73 we examined three strains across two species: *D. dadantii* 3937 (*Dda*3937), *D. dianthicola*

74 ME23 (*Ddia*ME23), and *D. dianthicola* 67-19 (*Ddia*6719). While these three strains are all  
75 pathogenic on potato, *Dda*3937 was originally isolated from *Saintpaulia ionantha* (Lemattre and  
76 Nancy, 1972), and *Ddia*6719 was originally isolated from New Guinea impatiens (*Impatiens*  
77 *hawkeri*) (Liu et al., 2020a, 2020b). *Dda*3937 has been a model strain used for molecular studies  
78 since its isolation in 1972 (Lemattre and Nancy, 1972), while *Ddia*ME23 was isolated as a  
79 representative strain for a 2014 potato disease outbreak (Ma et al., 2019). Pairwise ANI between  
80 *Dda*3937 and *Ddia*ME23 is 92.8% (Chen et al., 2019). Type strain *D. solani* IPO 2222 has a  
81 pairwise ANI score of 94.7% to *D. dadantii* 3937 (Chen et al., 2019). We aimed to directly test  
82 whether there was any variation in the contributions to competitive fitness for virulence traits and  
83 regulators.

84 Transposon mutagenesis of *P. carotovorum* followed by screening for altered soft rot  
85 symptoms in Chinese cabbage identified genes involved in nutrient utilization, production of  
86 PCWDEs, motility, biofilm formation, and toxin susceptibility (Lee et al., 2013). Transposon  
87 mutagenesis followed by high-throughput sequencing (TnSeq) is a valuable screening tool to  
88 identify genes important for growth in a given condition (van Opijnen et al., 2009). TnSeq has  
89 been used to identify *D. dadantii* genes important for growth in chicory (Royet et al., 2019). This  
90 work identified several metabolic pathways essential for *in planta* growth, primarily those  
91 involved in biosynthesis of nucleotides, amino acids, and some vitamins (Royet et al., 2019). A  
92 modification of TnSeq to add 20-nucleotide DNA “barcodes” to transposon donor plasmids,  
93 known as random barcode transposon-site sequencing (RB-TnSeq) enables highly-scalable  
94 TnSeq assays (Wetmore et al., 2015). This method has been applied to over 44 bacterial strains  
95 to date (Price et al., 2018), including plant pathogenic *Pseudomonas* spp. and *Ralstonia* spp.  
96 (Cole et al., 2017; Helmann et al., 2019; Georgoulis et al., 2020). By leveraging RB-TnSeq in a  
97 shared susceptible host for *D. dadantii* and *D. dianthicola*, we aimed to identify common and  
98 unique virulence factors among representative strains for these two species.

99

## 100 **Materials and Methods**

### 101 **PyParanoid gene ortholog group assignments.**

102 Gene ortholog groups were generated using the PyParanoid analysis pipeline v0.4.1  
103 (Melnyk et al., 2019). Peptide sequences from the following RefSeq genome assemblies were  
104 used to construct ortholog groups: GCF\_000147055.1 (*Dda*3937), GCF\_003403135.1  
105 (*Ddia*ME23), and GCF\_014893095.1 (*Ddia*6719). From these assemblies, RefSeq gene loci  
106 were then matched to their corresponding protein names to allow comparison to the Barcode  
107 Sequencing (BarSeq) fitness data. Additionally, Clusters of Orthologous Groups (COG)  
108 categories for *Dda*3937 were downloaded from the IMG database (Chen et al., 2019), GenBank  
109 gene names were replaced with their corresponding RefSeq names, and added to this ortholog  
110 table, allowing putative COG assignments for orthologous genes in *D. dianthicola* strains.

### 111 **Barcoded transposon library construction.**

112 Strains used in this study are described in Table S1. All bacteria were cultured in Luria-  
113 Bertani (LB) medium (10g tryptone, 5g yeast extract, and 10g NaCl per 1L) (Bertani, 1951) at  
114 28°C. Barcoded transposon libraries were constructed as previously described (Wetmore et al.,  
115 2015). Briefly, barcoded *mariner* transposon plasmid pKMW3 was conjugated from the *E. coli*  
116 WM3064 donor library APA752 (Wetmore et al., 2015) into wild-type *Dda*3937, *Ddia*ME23, and  
117 *Ddia*6719, each on 50 LB plates containing 300µM diaminopimelic acid (Sigma-Aldrich, USA).  
118 Conjugations were incubated at 28°C overnight, and exconjugants were then scraped into 10mM  
119 KPO<sub>4</sub>. This conjugation mixture was then spread onto 200 LB plates per strain, containing

120 50 $\mu$ g/ml kanamycin and incubated at 28°C for 3 days. All colonies were resuspended in 200ml  
121 LB with kanamycin, diluted to OD<sub>600</sub> 0.2, and grown at 28°C with shaking until OD<sub>600</sub> reached  
122 1.5 – 3.0, which corresponded to approximately 6 to 8 hours. Glycerol was added to the library  
123 to a final concentration of 15%, and 1ml aliquots were frozen at -80°C.

#### 124 **DNA library preparation and sequencing.**

125 For DNA library preparation, genomic DNA from each library was purified from an  
126 entire 1ml cell pellet using the Monarch Genomic DNA Purification Kit (New England Biolabs,  
127 USA). Samples were eluted in 50 $\mu$ l nuclease-free water. Purified DNA was quantified on a  
128 Nanodrop One (Thermo Fischer Scientific, USA), and 500ng DNA was used as input for the  
129 NEBNext Ultra II FS DNA Library Prep kit (New England Biolabs, USA), following the  
130 manufacturer’s instructions with modifications as follows. For enzymatic DNA fragmentation, a  
131 12-minute incubation time was used. DNA fragments were size selected using AMPure XP  
132 magnetic beads (Beckman Coulter, USA) at the recommended ratios 0.4X and 0.2X. We used a  
133 modified version of the protocol described in (Wetmore et al., 2015), with a two-step PCR used  
134 to enrich for transposon insertion sites, based on (Rubin et al., 2020). A custom splinkerette  
135 adapter was ligated to fragmented DNA, prepared by annealing oligos:  
136 /5Phos/G\*ATCGGAAGAGCACACGTCTGGGTTTTTTTTTTTCAAAAAA\*A and  
137 G\*AGATCGGTCTCGGCATTCCCAGACGTGTGCTCTTCCGATC\*T (Rubin et al., 2020).  
138 Between rounds of PCR and before submitting for sequencing, DNA was cleaned by binding to  
139 AMPure XP magnetic beads, using a bead ratio of 0.9X and eluted in 15 $\mu$ l 0.1X TE buffer for  
140 intermediate steps and 30 $\mu$ l 0.1X TE for sequencing. Finally, the sequencing library was  
141 quantified using a Qubit dsDNA HS assay kit (Thermo Fischer Scientific, USA). DNA libraries  
142 were submitted for sequencing at the Biotechnology Resource Center (BRC) Genomics Facility  
143 at the Cornell Institute of Biotechnology on an Illumina MiSeq to check library quality, followed  
144 by sequencing on a NextSeq 500 (Illumina, Inc. USA). All mapping used single-end sequencing  
145 for 150bp fragments.

#### 146 **Transposon library mapping.**

147 Sequence data were analyzed using the scripts MapTnSeq.pl and DesignRandomPool.pl  
148 from the FEBA package v1.3.1 (Wetmore et al., 2015) to map reads to the genome and assemble  
149 the mutant pool using barcodes seen in a single location 10 or more times. The transposon  
150 sequence “model\_pKMW3.2” was used to identify transposon sequence in the reads. All TnSeq  
151 mapping and BarSeq fitness calculation code is available at <http://bitbucket.org/berkeleylab/feba/>  
152 (Wetmore et al., 2015). Mapping scripts were run on a Cornell University BioHPC Cloud 40-  
153 core Linux (CentOS 7.6). server with 256GB RAM.

#### 154 **Gene essentiality predictions.**

155 Using the output from MapTnSeq.pl, gene essentiality predictions were made using  
156 <https://bitbucket.org/berkeleylab/feba/src/master/bin/Essentiality.pl> and the function “Essentials”  
157 from <https://bitbucket.org/berkeleylab/feba/src/master/lib/comb.R> (Wetmore et al., 2015). Using  
158 the median insertion density and the median length of genes >100bp, this method calculates how  
159 short a gene can be and still be unlikely to have no insertions by chance (P <0.02, Poisson  
160 distribution); genes shorter than this threshold are then excluded (Price et al., 2018). For the  
161 *Dickeya* strains examined here, the minimum gene length for a gene to be predicted as essential  
162 for growth in LB was 175bp (*Dda3937*) or 150bp (*DdiaME23* and *Ddia6719*). Protein-coding  
163 genes are then considered to be essential or nearly-essential if there are no fitness values and the  
164 normalized central insertion density score and normalized read density score as computed by the  
165 FEBA package were <0.2 (Price et al., 2018).

166 **Library pre-culture.**

167 For a given BarSeq experiment, a single transposon library freezer aliquot was thawed  
168 and recovered in 25ml LB containing 50µg/ml kanamycin at 28°C until OD600 ~ 0.5 to 0.7,  
169 approximately 6 to 8 hours. At this point, two 1ml cell pellets were frozen as time0  
170 measurements, and the remaining culture was washed in 10mM KPO<sub>4</sub> and used to inoculate  
171 experimental samples.

172 ***In vitro* samples.**

173 All *in vitro* cultures were grown in 1ml volumes in 24-well plates. In each well, 50µl  
174 starter culture at 0.3 OD600 was added to 950µl medium containing 50µg/ml kanamycin. Media  
175 tested were LB, Potato Dextrose Broth (PDB) (Sigma-Aldrich, USA), and M9 minimal medium  
176 (M9) as described in (M9 minimal medium (standard), 2010) but containing 0.4% glycerol  
177 instead of 0.4% glucose. Plates were incubated at 28°C with shaking at 200 rpm. After 1 day (LB  
178 and PDB) or 2 days (M9), each 1ml sample was pelleted and frozen prior to genomic DNA  
179 extraction.

180 **Tuber samples.**

181 Prior to inoculation, all tubers were rinsed and then surface sterilized by submerging in  
182 70% ethanol for 10 minutes, followed by two washes with distilled water. Inoculum was  
183 standardized to OD600 3.0 (approximately 10<sup>9</sup> CFU/ml), and 10µl was inoculated in two  
184 replicate stab wounds created by pushing a 200µl pipet tip roughly 3mm into each tuber. Six  
185 replicate tubers were used for each bacterial strain and potato cultivar. Inoculated tubers were  
186 stored in plastic bags at 28°C. Two days after inoculation, ~2cm length cores were taken at each  
187 site of inoculation using a 1cm diameter cork borer. Duplicate cores from each tuber were pooled  
188 in 8ml 10mM KPO<sub>4</sub> and shaken at 200rpm at 28°C for 10 minutes. For each sample, 2ml  
189 bacterial suspension was pelleted and frozen prior to DNA extraction.

190 **BarSeq PCR and sequencing.**

191 Genomic DNA was purified from cell pellets using the Monarch Genomic DNA  
192 Purification Kit (New England Biolabs, USA). Purified DNA samples were eluted in 30µl  
193 nuclease-free water and quantified on a Nanodrop One (Thermo Fischer Scientific, USA). After  
194 gDNA extraction, the 98°C BarSeq PCR as described in (Wetmore et al., 2015) was used to  
195 specifically amplify the barcode region of each sample. The PCR for each sample was performed  
196 in 50µl total volume: containing 0.5µl Q5 High-Fidelity DNA polymerase (New England  
197 Biolabs, USA), 10µl 5X Q5 buffer, 10µl 5X GC enhancer, 1µl 10mM dNTPs, 150 to 200 ng  
198 template gDNA, 2.5µl common reverse primer (BarSeq\_P1), and 2.5µl of forward primer from  
199 one of the 96 indexed forward primers (BarSeq\_P2\_ITXXX), both at 10µM (Wetmore et al.,  
200 2015). Following the BarSeq PCR, 10µl of each reaction was pooled (46 to 49 samples per pool),  
201 and 200µl of this DNA pool was subsampled and purified using the DNA Clean & Concentrator  
202 Kit (Zymo Research, USA). The final DNA sequencing library was eluted in 30µl nuclease-free  
203 water, quantified on a Nanodrop One, and submitted for sequencing at the BRC Genomics  
204 Facility at the Cornell Institute of Biotechnology. Each sequencing pool was run on a single  
205 NextSeq 500 (Illumina, Inc., USA) lane for 75 bp single-end reads.

206 **Gene fitness calculations.**

207 Sequencing reads were used to calculate genome-wide gene fitness using the FEBA  
208 scripts MultiCodes.pl, combineBarSeq.pl, and BarSeqR.pl (Wetmore et al., 2015). Scripts to  
209 calculate gene fitness values were run on a Cornell University BioHPC Cloud 40-core Linux  
210 (CentOS 7.6). server with 256GB RAM. Fitness values for each gene were calculated as the log<sub>2</sub>  
211 ratio of relative barcode abundance following library growth under a given condition divided by

212 the relative abundance in the time0 sample. Barcode counts were summed between replicate  
213 time0 samples. For analysis, genes were required to have at least 3 reads per strain and 30 reads  
214 per gene in the time0 sample (Wetmore et al., 2015). The fitness values were calculated based on  
215 the “central” transposon insertions only, i.e., those within the central 10% to 90% of a gene. The  
216 normalized median gene fitness value was 0. All experiments described here passed previously  
217 described quality control metrics (Wetmore et al., 2015).

### 218 **Fitness analysis and plotting.**

219 We focused on genes having fitness values  $>1$  or  $<-1$  and absolute t-like test statistic  $>4$ .  
220 This t score is an estimate of the reliability of the fitness measurement for a gene, and is equal to  
221 the fitness value divided by the square root of the maximum variance calculated in two ways  
222 (Wetmore et al., 2015). With these cutoffs, we also calculated gene fitness values comparing  
223 replicate time0 samples (Price et al., 2018; Liu et al., 2021). Across 6 (each *Dda3937* and  
224 *DdiaME23*) and 2 (*Ddia6719*) replicate time0 samples, 0 gene fitness values had fitness  $>1$  or  $<-$   
225 1 and absolute  $t >4$ . Data were analyzed in R v4.0.3 (R Core Team, 2017) using the package  
226 ggplot2 v3.3.5 (Wickham, 2016). The principal components analysis was performed on the gene  
227 fitness matrix for each strain using the R function prcomp, which performs centered singular  
228 value decomposition.

### 229 **Data availability Statement.**

230 All raw Illumina reads used for mapping and fitness assays have been deposited in the  
231 Sequence Read Archive under BioProject accession number PRJNA692477. Individual sample  
232 accession numbers are listed in Table S2. Annotated scripts used for computational analysis are  
233 available at [github.com/tylerhelmann/dickeya-barseq-2021](https://github.com/tylerhelmann/dickeya-barseq-2021). Experimental fitness values are  
234 publicly available at [fit.genomics.lbl.gov](https://fit.genomics.lbl.gov).

## 235 **Results**

### 237 **Identification of homologous gene families in *D. dadantii* 3937, *D. dianthicola* ME23 and *D.* 238 *dianthicola* 67-19.**

239 To enable direct comparison of gene fitness measurements between strains, we  
240 constructed a database of homologous gene families using the PyParanoid analysis pipeline  
241 (Melnik et al., 2019). Based on clustering of all predicted protein sequences from *Dda3937*,  
242 *DdiaME23*, and *Ddia6719*, 3,821 total homolog groups were identified, representing 88.1% of  
243 the total input sequences. Of these, 3,310 groups contained single-copy genes in all three strains.  
244 For each group, gene loci, protein identifiers, and gene descriptions are listed in Table S3. This  
245 table also contains COG assignments matched from the *Dda3937* IMG genomic annotation  
246 (Chen et al., 2019).

### 247 **Creation of barcoded transposon libraries in *Dickeya* spp.**

248 To measure contributions of individual genes to fitness, we constructed barcoded  
249 transposon mutant libraries in the *Dickeya* strains using a barcoded *mariner E. coli* donor library  
250 (Wetmore et al., 2015). These libraries ranged in size from 334,893 to 541,278 mapped genomic  
251 insertional strains, with 37 to 62 median strains per hit gene (Table 1). Of the three strains tested,  
252 only one gene in the *Ddia6719* genome did not contain any TA dinucleotide sites and was  
253 therefore inaccessible to the *mariner* transposon. Mapped insertions were evenly distributed  
254 across the chromosome of each strain (Fig. S1).

### 255 **Identification of essential gene sets in *D. dadantii* and *D. dianthicola*.**

256 Based on analysis of the TnSeq mapping data, essential genes were predicted using the  
257 FEBA RB-TnSeq analysis pipeline (Wetmore et al., 2015; Price et al., 2018). We identified 374

258 to 426 genes per strain that are likely to encode essential or near-essential genes for growth in  
259 LB (Table S4). Using the ortholog group assignments for these genes, 316 of these predicted  
260 essential genes (74 to 84%) are shared among all three strains (Fig. S2). Most predicted essential  
261 genes are in the functional categories of “Translation, ribosomal structure, and biogenesis”, “Cell  
262 wall/membrane/envelope biogenesis”, “Coenzyme transport and metabolism”, “Energy  
263 production and conversions”, and “Replication, recombination, and repair” (Table S5).

#### 264 **Conducting pooled growth assays to measure relative mutant fitness.**

265 To generate genome-wide gene fitness values for the barcoded transposon libraries, each  
266 strain was grown in the rich media LB and Potato Dextrose Broth (PDB) as well as M9 minimal  
267 medium supplemented with 0.4% glycerol (Fig. S3). Strain fitness values were calculated as a  
268 log<sub>2</sub> ratio of barcode abundance following sample growth with barcode abundance measured in  
269 the time0 duplicate samples. Gene fitness is the weighted average of individual strain fitness  
270 values (Wetmore et al., 2015). For fitness calculations, insertions in the first and last 10% of  
271 coding regions were excluded, with insertions in the remaining 80% of the gene considered  
272 “central”. While 91 to 92% of genes in all strains contained centrally mapped insertions, not all  
273 genes were used in fitness calculations due to low read or insertion abundance. We focused our  
274 analysis on genes with fitness values >1 or <-1, and absolute t-score >4 (Table S6). Across all  
275 conditions, we calculated fitness values for 3,705 (*Dda3937*), 3,761 (*DdiaME23*), and 3,528  
276 (*Ddia6719*) genes, representing 88%, 90%, and 86% of the total genes in each strain  
277 respectively.

278 Principle component analysis showed gene fitness values of the three tuber conditions  
279 overlapped (Fig. 1), and so these samples were jointly considered as a single “Tuber” condition  
280 for some subsequent analyses.

#### 281 **Disruption mutants with fitness defects in rich media.**

282 As the libraries were constructed on LB medium, relatively few mutations deleterious in  
283 LB were maintained in the populations (Fig. 2). Fig. 3 presents these data split by COG category.  
284 Limited mutations in genes categorized as “cell wall/membrane/envelope biogenesis” (*mdoGH*)  
285 and “cell cycle control, cell division, chromosome partitioning” (*ftsX*) were present in the  
286 mapped populations but generally detrimental in LB for all three strains (Fig. S4). Even in LB,  
287 some variation was apparent between strains, such as disruptions in the gene encoding the cell  
288 division protein ZapB which decreased competitive fitness in *Dda3937* but not *DdiaME23* or  
289 *Ddia6719* (Fig. S4).

290 The rich medium PDB provided a very different gene fitness profile than LB. In  
291 *Dda3937* and *Ddia6719* similar numbers of genes were detrimental (fit >1) as were beneficial  
292 (fit <-1) in this condition (Fig. 2). Genes in diverse metabolic categories contributed to  
293 competitive fitness, including “amino acid transport and metabolism”, “carbohydrate transport  
294 and metabolism”, “cell wall/membrane/envelope biogenesis”, “coenzyme transport and  
295 metabolism”, “inorganic ion transport and metabolism”, “nucleotide transport and metabolism”,  
296 “signal transduction mechanisms”, “transcription”, and “translation, ribosomal structure, and  
297 biogenesis” (Fig. 3). For example, in all three strains oligopeptidase A and the low affinity  
298 potassium transporter Kup were specifically important in PDB for growth (Fig. S5). Disruptions  
299 in the two-component system RtsAB were specifically beneficial for *Dda3937* in PDB, as were  
300 disruptions in the zinc uptake transcriptional repressor Zur (Fig. S5). Though LB and PDB are  
301 both complex rich media, specific available nutrients differed enough to clearly separate the gene  
302 fitness profiles for *Dda3937* and *Ddia6719*, though not for *DdiaME23* (Fig. 1).

#### 303 **Disruption mutants with fitness defects in minimal medium.**

304 In the minimal medium M9 containing glycerol as a carbon source, important genes  
305 included categories such as “amino acid transport and metabolism”, “carbohydrate transport and  
306 metabolism”, “coenzyme transport and metabolism”, and “nucleotide transport and metabolism”.  
307 While many amino acids were limiting in both M9 and tuber samples, arginine biosynthetic  
308 genes (*argCEFGH*) were uniquely important in M9, suggesting the presence of available  
309 arginine in tubers (Fig. 4). Conversely, mutations in many “cell motility” genes had a large  
310 positive effect, though this effect was often limited to *Dda3937* (Fig. 5). This is indicative of the  
311 limited energy available in minimal medium, and the high energy cost of motility.

### 312 **Genes contributing to growth in tubers.**

313 To calculate genome-wide gene fitness values in an ecologically- and economically-  
314 relevant condition, we inoculated the transposon libraries into tubers of three potato cultivars:  
315 “Atlantic”, “Dark Red Norland”, and “Upstate Abundance”. As each transposon library contains  
316 over 300,000 unique strains, we inoculated approximately  $10^7$  cells into each tuber (10 $\mu$ l of a  $10^9$   
317 CFU/ml solution). After two days incubation at high humidity, we recovered cells by streaming  
318 for barcode sequencing and calculation of gene fitness values. Many genes involved in amino  
319 acid biosynthesis that were important for growth in M9 were also important in tubers (*leuAC*,  
320 *thrC*, *serB*), highlighting potentially limiting factors for growth during potato soft rot (Fig. 6).

321 The pectin degradation protein 2-dehydro-3-deoxy-D-gluconate 5-dehydrogenase *KduD*  
322 was specifically important for growth in tubers (Fig. 7). Interestingly, we identified several  
323 putative DNA-binding or helix-turn-helix transcriptional regulators where mutant strains had  
324 strain-specific increased fitness in tubers (Fig. 7). Insertions in the *Ddia6719* helix-turn-helix  
325 transcriptional regulator *HGI48\_RS01985* increased fitness in tubers, while insertions in the  
326 paralog *HGI48\_RS02000* had no effect on fitness. There is no ortholog for this gene in *Dda3937*,  
327 and the ortholog in *DdiaME23* had no disruption phenotype in any condition tested (Fig. 7).

328

### 329 **Discussion**

330 By measuring genome-wide gene contributions to growth, we identified a comprehensive  
331 list of genes in three *Dickeya* strains that contribute to fitness in diverse conditions including  
332 potato tubers. Our data generally support previous findings from other groups, including the  
333 importance of diverse metabolic capabilities during tuber colonization and the production of  
334 pectin degradation proteins (Condemine and Robert-Baudouy, 1991). Royet et al. used TnSeq  
335 in the *Dickeya*-chicory pathosystem to identify important genes for growth in leaves (Royet et  
336 al., 2019). While there are important differences between the different plant tissue types, our  
337 results were very similar overall. Many core metabolic processes were highly important in both  
338 minimal medium and tuber samples, such as biosynthesis of many amino acids. However, potato  
339 tubers contain higher arginine concentrations than other essential amino acids (Bártová et al.,  
340 2015), correlating with the dispensability of the arginine biosynthetic genes (*argCEFGH*) in  
341 tubers (Fig. 4). Interestingly, though an *Erwinia amylovora argD* mutant is auxotrophic and  
342 nonpathogenic in apple (Ramos et al., 2014), *argD* is present in two apparently redundant copies  
343 in *Dda3937* (*DDA3937\_RS19450* and *DDA3937\_RS03635*), and mutants in these genes had no  
344 phenotype in the conditions tested. Previous studies have shown the important of chemotaxis and  
345 motility for early-stage virulence (Jahn et al., 2008), but these traits were dispensable for growth  
346 in tubers with the inoculation and sampling methods used here.

347 While *D. dadantii* and *D. dianthicola* can cause soft rot on potato tubers, variation in  
348 some key genes under these conditions suggests species- and strain-level differences in virulence  
349 strategies and stress responses. General strategies for environmental growth and host



350 colonization are consistent, such as general metabolic capabilities and stress tolerance. However,  
351 gene fitness data suggest variation in gene regulation, such as the helix-turn-helix and other  
352 putative DNA-binding proteins. Furthermore, the large fitness increases seen in liquid minimal  
353 medium when flagellar genes are disrupted in *Dda3937* but not *DdiaME23* or *Ddia6719* might  
354 indicate weaker control of gene expression, and therefore energy loss and decreased growth  
355 when these traits are dispensable or unnecessary. Further characterization of the regulation of  
356 these traits is needed.

357 The scalability of RB-TnSeq, paired with ortholog identification, has proven to be a  
358 useful method to directly compare gene fitness between related strains. *Dickeya* species  
359 generally have common virulence strategies, primarily the production of plant cell wall  
360 degrading enzymes such as pectate lyases (Reverchon et al., 2016). However, genomic and  
361 transcriptomic variation at the strain and species level highlights distinctive virulence traits  
362 (Raoul des Essarts et al., 2019). This leads to the intriguing possibility that while enzymatic  
363 virulence traits are shared across pathogens, there exists strain-specific virulence regulation. This  
364 idea has been proposed, but not directly tested, in *D. solani* based on predicted binding sites for  
365 transcriptional regulators (Golanowska et al., 2018). In the case of our study, while *Dda3937* is  
366 pathogenic on potato, it was originally isolated from *Saintpaulia ionantha* (Lemattre and Narcy,  
367 1972), suggesting potato infection is simply opportunistic. *Ddia67-19* was originally isolated  
368 from New Guinea impatiens (*Impatiens hawkeri*) (Liu et al., 2020a), but observed symptoms in  
369 tubers were similar to those caused by *DdiaME23*. Based on our fitness data, pan-genome  
370 analysis within the *Dickeya* clade might indicate other strains with potentially interesting genome  
371 composition for RB-TnSeq analysis.

372 This study focused on isolated strain growth, to generate a comprehensive dataset of  
373 likely essential genes in *D. dadantii* and *D. dianthicola*, and those involved in potato soft rot.  
374 Testing other *Dickeya* species, as well as related pathogens such as *Pectobacterium* spp., will  
375 more broadly support our understanding of soft rot pathogens. Furthermore, varied additional *in*  
376 *vitro* conditions such as alternative carbon and nitrogen sources can clarify specific metabolic  
377 pathways used by these strains for full virulence. In the field, soft rot symptoms can be the result  
378 of complex community interactions, with *Dickeya* and *Pectobacterium* co-infections frequently  
379 observed (Ge et al., 2021a). It would be interesting to see if the presence of additional  
380 community members might change the genes required for full competitive fitness. Though there  
381 are no resistant potato cultivars, varieties have been identified with disease tolerance (Lyon,  
382 1989). Tolerance mechanisms being tested include plant cell wall modifications, production of  
383 bactericidal proteins and specialized metabolites, and molecules to dysregulate bacterial quorum  
384 sensing (Czajkowski et al., 2011). Good hygiene controls at the seed treatment and postharvest  
385 stages are also critical for disease mitigation (van der Wolf and De Boer, 2007; Toth et al.,  
386 2011). Understanding bacterial virulence strategies will aid in breeding efforts, as well as  
387 identify potential bacterial traits that could enable overcoming host tolerance or exacerbating  
388 disease at all stages of production.

389

## 390 **Acknowledgements**

391 The authors would like to thank Walter De Jong and the Cornell Potato Breeding  
392 Program for providing potato tubers. The authors also thank Adam Deutschbauer for providing  
393 the donor *E. coli* library APA752 containing the barcoded *mariner* vector and Morgan Price for  
394 assisting with the FEBA pipeline and data upload to the Fitness Browser. Sequencing was  
395 performed by the Biotechnology Resource Center (BRC) Genomics Facility at the Cornell

396 Institute of Biotechnology. Mention of trade names or commercial products in this publication is  
397 solely for the purpose of providing specific information and does not imply recommendation or  
398 endorsement by the U.S. Department of Agriculture. USDA is an equal opportunity provider and  
399 employer.

## 400 References

- 401 Adeolu, M., Alnajar, S., Naushad, S., and Gupta, R. S. (2016). Genome-based phylogeny and  
402 taxonomy of the ‘*Enterobacteriales*’: Proposal for Enterobacterales ord. nov. divided into  
403 the families *Enterobacteriaceae*, *Erwiniaceae* fam. nov., *Pectobacteriaceae* fam. nov.,  
404 *Yersiniaceae* fam. nov., <. *Int. J. Syst. Evol. Microbiol.* 66, 5575–5599.  
405 doi:10.1099/ijsem.0.001485.
- 406 Adriaenssens, E. M., van Vaerenbergh, J., Vandenheuvel, D., Dunon, V., Ceysens, P. J., de  
407 Proft, M., et al. (2012). T4-related bacteriophage LIMEstone isolates for the control of soft  
408 rot on potato caused by “*Dickeya solani*.” *PLoS One* 7, e33227.  
409 doi:10.1371/journal.pone.0033227.
- 410 Bártová, V., Bárta, J., Brabcová, A., Zdráhal, Z., and Horáčková, V. (2015). Amino acid  
411 composition and nutritional value of four cultivated South American potato species. *J. Food*  
412 *Compos. Anal.* 40, 78–85. doi:10.1016/j.jfca.2014.12.006.
- 413 Bertani, G. (1951). Studies on lysogenesis. I. The mode of phage liberation by lysogenic  
414 *Escherichia coli*. *J. Bacteriol.* 62, 293–300. doi:10.1128/JB.62.3.293-300.1951.
- 415 Chen, I. M. A., Chu, K., Palaniappan, K., Pillay, M., Ratner, A., Huang, J., et al. (2019). IMG/M  
416 v.5.0: an integrated data management and comparative analysis system for microbial  
417 genomes and microbiomes. *Nucleic Acids Res.* 47, D666–D677. doi:10.1093/nar/gky901.
- 418 Chung, Y. S., Goeser, N. J., Cai, X., and Jansky, S. (2013). The effect of long term storage on  
419 bacterial soft rot resistance in potato. *Am. J. Potato Res.* 90, 351–356. doi:10.1007/s12230-  
420 013-9311-6.
- 421 Cole, B. J., Feltcher, M. E., Waters, R. J., Wetmore, K. M., Mucyn, T. S., Ryan, E. M., et al.  
422 (2017). Genome-wide identification of bacterial plant colonization genes. *PLoS Biol.* 15, 1–  
423 24. doi:10.1371/journal.pbio.2002860.
- 424 Condemine, G., and Robert Baudouy, J. (1991). Analysis of an *Erwinia chrysanthemi* gene  
425 cluster involved in pectin degradation. *Mol. Microbiol.* 5, 2191–2202. doi:10.1111/j.1365-  
426 2958.1991.tb02149.x.
- 427 Czajkowski, R., Pérombelon, M. C. M., Van Veen, J. A., and Van der Wolf, J. M. (2011).  
428 Control of blackleg and tuber soft rot of potato caused by *Pectobacterium* and *Dickeya*  
429 species: A review. *Plant Pathol.* 60, 999–1013. doi:10.1111/j.1365-3059.2011.02470.x.
- 430 Czajkowski, R., Smolarska, A., and Ozymko, Z. (2017). The viability of lytic bacteriophage  
431 ΦD5 in potato-associated environments and its effect on *Dickeya solani* in potato (*Solanum*  
432 *tuberosum* L.) plants. *PLoS One* 12, 1–17. doi:10.1371/journal.pone.0183200.
- 433 Ge, T., Ekbataniamiri, F., Johnson, S. B., Larkin, R. P., and Hao, J. (2021a). Interaction between  
434 *Dickeya dianthicola* and *Pectobacterium parmentieri* in potato infection under field  
435 conditions. *Microorganisms* 9, 1–10. doi:10.3390/microorganisms9020316.
- 436 Ge, T., Jiang, H., Tan, E. H., Johnson, S. B., Larkin, R., Charkowski, A. O., et al. (2021b).  
437 Pangenomic analysis of *Dickeya dianthicola* strains related to the outbreak of blackleg and  
438 soft rot of potato in USA. *Plant Dis.*, 1–31. doi:10.1094/PDIS-03-21-0587-RE.
- 439 Georgoulis, S., Shalvarjian, K. E., Helmann, T. C., Hamilton, C. D., Carlson, H. K.,  
440 Deutschbauer, A. M., et al. (2020). Genome-wide identification of tomato xylem sap fitness  
441 factors for *Ralstonia pseudosolanacearum* and *Ralstonia syzygii*. *bioRxiv*, 1–45.  
442 doi:https://doi.org/10.1101/2020.08.31.276741.
- 443 Golanowska, M., Potrykus, M., Motyka-Pomagruk, A., Kabza, M., Bacci, G., Galardini, M., et  
444 al. (2018). Comparison of highly and weakly virulent *Dickeya solani* strains, with a view on  
445 the pangenome and panregulon of this species. *Front. Microbiol.* 9, 1–19.

- 446 doi:10.3389/fmicb.2018.01940.
- 447 Helmann, T. C., Deutschbauer, A. M., and Lindow, S. E. (2019). Genome-wide identification of  
448 *Pseudomonas syringae* genes required for fitness during colonization of the leaf surface and  
449 apoplast. *Proc. Natl. Acad. Sci.* 116, 18900–18910. doi:10.1073/pnas.1908858116.
- 450 Jahn, C. E., Willis, D. K., and Charkowski, A. O. (2008). The flagellar sigma factor FliA is  
451 required for *Dickeya dadantii* virulence. *Mol. Plant-Microbe Interact.* 21, 1431–1442.  
452 doi:10.1094/MPMI-21-11-1431.
- 453 Jiang, X., Zghidi-Abouzid, O., Oger-Desfeux, C., Hommais, F., Greliche, N., Muskhelishvili, G.,  
454 et al. (2016). Global transcriptional response of *Dickeya dadantii* to environmental stimuli  
455 relevant to the plant infection. *Environ. Microbiol.* 18, 3651–3672. doi:10.1111/1462-  
456 2920.13267.
- 457 Lee, D. H., Lim, J. A., Lee, J., Roh, E., Jung, K., Choi, M., et al. (2013). Characterization of  
458 genes required for the pathogenicity of *Pectobacterium carotovorum* subsp. *carotovorum*  
459 Pcc21 in Chinese cabbage. *Microbiol. (United Kingdom)* 159, 1487–1496.  
460 doi:10.1099/mic.0.067280-0.
- 461 Lemattre, M., and Narcy, J. P. (1972). Une affection bacterienne nouvelle du Saintpaulia due a  
462 *Erwinia chrysanthemi*. *C. R. Acad. Sci* 58, 227–231.
- 463 Liu, H., Shiver, A. L., Price, M. N., Carlson, H. K., Trotter, V. V., Chen, Y., et al. (2021).  
464 Functional genetics of human gut commensal *Bacteroides thetaiotaomicron* reveals  
465 metabolic requirements for growth across environments. *Cell Rep.* 34, 108789.  
466 doi:10.1016/j.celrep.2021.108789.
- 467 Liu, Y., Helmann, T., Stodghill, P., and Filiatrault, M. (2020a). Complete genome sequence  
468 resource for the necrotrophic plant-pathogenic bacterium *Dickeya dianthicola* 67-19  
469 isolated from New Guinea Impatiens. *Plant Dis.*, PDIS-09-20-1968-A. doi:10.1094/PDIS-  
470 09-20-1968-A.
- 471 Liu, Y., Vasiu, S., Daughtrey, M. L., and Filiatrault, M. (2020b). First Report of *Dickeya*  
472 *dianthicola* causing blackleg on New Guinea Impatiens (*Impatiens hawkeri*) in New York  
473 State, USA. *Plant Dis.* doi:10.1094/pdis-09-20-2020-pdn.
- 474 Lyon, G. D. (1989). The biochemical basis of resistance of potatoes to soft rot *Erwinia* spp.—a  
475 review. *Plant Pathol.* 38, 313–339. doi:10.1111/j.1365-3059.1989.tb02152.x.
- 476 M9 minimal medium (standard) (2010). *Cold Spring Harb. Protoc.* 2010, pdb.rec12295.  
477 doi:10.1101/pdb.rec12295.
- 478 Ma, X., Perna, N. T., Glasner, J. D., Hao, J., Johnson, S., Nasaruddin, A. S., et al. (2019).  
479 Complete genome sequence of *Dickeya dianthicola* ME23, a pathogen causing blackleg and  
480 soft rot diseases of potato. *Microbiol. Resour. Announc.* 8, 14–15. doi:10.1128/mra.01526-  
481 18.
- 482 Melnyk, R. A., Hossain, S. S., and Haney, C. H. (2019). Convergent gain and loss of genomic  
483 islands drives lifestyle changes in plant-associated *Pseudomonas*. *ISME J.* 13, 1575–1588.  
484 doi:10.1101/345488.
- 485 Motyka-Pomagruk, A., Zoledowska, S., Misztak, A. E., Sledz, W., Mengoni, A., and Lojkowska,  
486 E. (2020). Comparative genomics and pangenome-oriented studies reveal high homogeneity  
487 of the agronomically relevant enterobacterial plant pathogen *Dickeya solani*. *BMC*  
488 *Genomics* 21, 1–18. doi:10.1186/s12864-020-06863-w.
- 489 Motyka, A., Zoledowska, S., Sledz, W., and Lojkowska, E. (2017). Molecular methods as tools  
490 to control plant diseases caused by *Dickeya* and *Pectobacterium* spp: A minireview. *N.*  
491 *Biotechnol.* 39, 181–189. doi:10.1016/j.nbt.2017.08.010.

- 492 Parkinson, N., DeVos, P., Pirhonen, M., and Elphinstone, J. (2014). *Dickeya aquatica* sp. nov.,  
493 isolated from waterways. *Int. J. Syst. Evol. Microbiol.* 64, 2264–2266.  
494 doi:10.1099/ijs.0.058693-0.
- 495 Price, M. N., Wetmore, K. M., Waters, R. J., Callaghan, M., Ray, J., Liu, H., et al. (2018).  
496 Mutant phenotypes for thousands of bacterial genes of unknown function. *Nature* 557, 503–  
497 509. doi:10.1038/s41586-018-0124-0.
- 498 R Core Team (2017). R: A language and environment for statistical computing. Vienna, Austria:  
499 R Foundation for Statistical Computing doi:10.1007/978-3-540-74686-7.
- 500 Ramos, L. S., Lehman, B. L., Peter, K. A., and McNellis, T. W. (2014). Mutation of the *Erwinia*  
501 *amylovora* *argD* gene causes arginine auxotrophy, nonpathogenicity in apples, and reduced  
502 virulence in pears. *Appl. Environ. Microbiol.* 80, 6739–6749. doi:10.1128/AEM.02404-14.
- 503 Raoul des Essarts, Y., Pédrón, J., Blin, P., Van Dijk, E., Faure, D., and Van Gijsegem, F. (2019).  
504 Common and distinctive adaptive traits expressed in *Dickeya dianthicola* and *Dickeya*  
505 *solani* pathogens when exploiting potato plant host. *Environ. Microbiol.* 21, 1004–1018.  
506 doi:10.1111/1462-2920.14519.
- 507 Reverchon, S., Muskhelishvili, G., and Nasser, W. (2016). *Virulence Program of a Bacterial*  
508 *Plant Pathogen: The Dickeya Model*. Elsevier Inc. doi:10.1016/bs.pmbts.2016.05.005.
- 509 Royet, K., Parisot, N., Rodrigue, A., Gueguen, E., and Condemine, G. (2019). Identification by  
510 Tn-seq of *Dickeya dadantii* genes required for survival in chicory plants. *Mol. Plant Pathol.*  
511 20, 287–306. doi:10.1111/mpp.12754.
- 512 Rubin, B. E., Diamond, S., Cress, B. F., Crits-Christoph, A., He, C., Xu, M., et al. (2020).  
513 Targeted genome editing of bacteria within microbial communities. *bioRxiv*, 1–49.  
514 doi:10.1101/2020.07.17.209189.
- 515 Samson, R., Legendre, J. B., Christen, R., Fischer-Le Saux, M., Achouak, W., and Gardan, L.  
516 (2005). Transfer of *Pectobacterium chrysanthemi* (Burkholder et al. 1953) Brenner et al.  
517 1973 and *Brenneria paradisiaca* to the genus *Dickeya* gen. nov. as *Dickeya chrysanthemi*  
518 comb. nov. and *Dickeya paradisiaca* comb. nov. and deli. *Int. J. Syst. Evol. Microbiol.* 55,  
519 1415–1427. doi:10.1099/ijs.0.02791-0.
- 520 Tian, Y., Zhao, Y., Yuan, X., Yi, J., Fan, J., Xu, Z., et al. (2016). *Dickeya fangzhongdai* sp. nov.,  
521 a plant-pathogenic bacterium isolated from pear trees (*Pyrus pyrifolia*). *Int. J. Syst. Evol.*  
522 *Microbiol.* 66, 2831–2835. doi:10.1099/ijsem.0.001060.
- 523 Toth, I. K., van der Wolf, J. M., Saddler, G., Lojkowska, E., Hélias, V., Pirhonen, M., et al.  
524 (2011). *Dickeya* species: An emerging problem for potato production in Europe. *Plant*  
525 *Pathol.* 60, 385–399. doi:10.1111/j.1365-3059.2011.02427.x.
- 526 van der Wolf, J. M., and De Boer, S. H. (2007). *Bacterial pathogens of potato*. Elsevier B.V.  
527 doi:10.1016/B978-044451018-1/50069-5.
- 528 Van Gijsegem, F., Toth, I. K., and van der Wolf, J. M. (2021). “Outlook-Challenges and  
529 perspectives for management of diseases caused by *Pectobacterium* and *Dickeya* species,”  
530 in *Plant Diseases Caused by Dickeya and Pectobacterium Species*, eds. F. Van Gijsegem, J.  
531 M. van der Wolf, and I. K. Toth (Cham: Springer International Publishing), 283–289.  
532 doi:10.1007/978-3-030-61459-1\_9.
- 533 van Opijnen, T., Bodi, K. L., and Camilli, A. (2009). Tn-seq: high-throughput parallel  
534 sequencing for fitness and genetic interaction studies in microorganisms. *Nat. Methods* 6,  
535 767–772. doi:10.1038/nmeth.1377.
- 536 Wetmore, K. M., Price, M. N., Waters, R. J., Lamson, J. S., He, J., Hoover, C. A., et al. (2015).  
537 Rapid quantification of mutant fitness in diverse bacteria by sequencing randomly bar-

- 538 coded transposons. *MBio* 6, 1–15. doi:10.1128/mBio.00306-15.
- 539 Wickham, H. (2016). *ggplot2: Elegant Graphics for Data Analysis*. Springer-Verlag New York
- 540 Available at: <https://ggplot2.tidyverse.org>.
- 541 Wolf, J. M. Van Der, Nijhuis, E. H., Kowalewska, M. J., Saddler, G. S., Parkinson, N.,
- 542 Elphinstone, J. G., et al. (2014). *Dickeya solani* sp . nov ., a pectinolytic plant-pathogenic
- 543 bacterium isolated from potato (*Solanum tuberosum*). *Int. J. Syst. Evol. Microbiol.* 64, 768–
- 544 774. doi:10.1099/ijs.0.052944-0.
- 545 Zhang, Y., Fan, Q., and Loria, R. (2016). A re-evaluation of the taxonomy of phytopathogenic
- 546 genera *Dickeya* and *Pectobacterium* using whole-genome sequencing data. *Syst. Appl.*
- 547 *Microbiol.* 39, 252–259. doi:10.1016/j.syapm.2016.04.001.
- 548

549 **Tables**

550

551 **Table 1.** Characteristics of the *mariner* transposon libraries. “Central” insertions are those within  
552 the central 10 – 90% of a gene.

553

| Library                     | Insertions in genome | Central insertion strains | Genes with central insertions (Total) | Median strains per hit gene |
|-----------------------------|----------------------|---------------------------|---------------------------------------|-----------------------------|
| <i>D. dadantii</i> 3937     | 337,541              | 193,696                   | 3,882 (4,213)                         | 37                          |
| <i>D. dianthicola</i> ME23  | 541,278              | 321,087                   | 3,805 (4,182)                         | 62                          |
| <i>D. dianthicola</i> 67-19 | 334,893              | 200,170                   | 3,728 (4,110)                         | 41                          |

554

555

## 556 **Figure Legends**

557

558 **Figure 1.** PCA of experimental samples based on fitness values calculated for each library.  
559 Available fitness values for each sample: N= 3,705 *D. dadantii* 3937; 3,761 *D. dianthicola*  
560 ME23; 3,528 *D. dianthicola* 67-19). Superimposed ellipses are based on a multivariate t-  
561 distribution.

562

563 **Figure 2.** Number of unique genes for each condition with fitness values of  $<-1$  or  $>1$ , and  
564 absolute t-like test statistic  $>4$  in at least one replicate sample.

565

566 **Figure 3.** Number of unique genes for each condition with fitness values of  $<-1$  or  $>1$ , and  
567 absolute t-like test statistic  $>4$  in at least one replicate sample. Genes where fit  $<-1$  are show  
568 below the line  $y=0$ , while genes where fit  $>1$  are shown above. COG assignments are based on  
569 the *D. dadantii* 3937 annotation in the IMG database (Chen et al., 2019), and extrapolated to *D.*  
570 *dianthicola* ME23 and *D. dianthicola* 67-19 based on PyParanoid-generated ortholog groups.

571

572 **Figure 4.** Mutations in arginine biosynthetic genes are detrimental only in M9 minimal medium.  
573 Gene fitness values for argininosuccinate synthase ArgG (group 00579), argininosuccinate lyase  
574 ArgH (group 00633), acetylornithine deacetylase ArgE (group 00844), N-acetyl-gamma-  
575 glutamyl-phosphate reductase ArgC (group 01191), and ornithine carbamoyltransferase ArgF  
576 (group 01248).

577

578 **Figure 5.** Mutations in flagellar-associated genes increase competitive fitness of *D. dadantii*  
579 3937 in M9 minimal medium. Gene fitness values for flagellar biosynthesis protein FlhA (group  
580 00200), flagellar hook-associated protein FlgK (group 00303), flagellar motor protein MotB  
581 (group 001162), and RNA polymerase sigma factor FliA (group 02116.)

582

583 **Figure 6.** Amino acid biosynthetic genes important in M9 minimal medium as well as growth in  
584 potato tubers. Gene fitness values for 2-isopropylmalate synthase LeuA (group 00407), 3-  
585 isopropylmalate dehydratase large subunit LeuC (group 00578), threonine synthase ThrC (group  
586 00763), and phosphoserine phosphatase SerB (group 01340).

587

588 **Figure 7.** In tubers, pectin degradation contributes to growth, while the role of putative DNA-  
589 binding proteins varies among strains. Pectin degradation by 2-dehydro-3-deoxy-D-gluconate 5-  
590 dehydrogenase KduD (group 01938) is specifically important for growth in tubers. Gene fitness  
591 values shown for three putative DNA binding proteins: ortholog groups 02970, 03140, and  
592 03332. There was no ortholog detected in *D. dadantii* 3937 for group 03332. In *D. dianthicola*  
593 67-19, there are two genes in group 03332. All other orthogroup members are single-copy in  
594 each strain.

595



### A. *D. dadantii* 3937

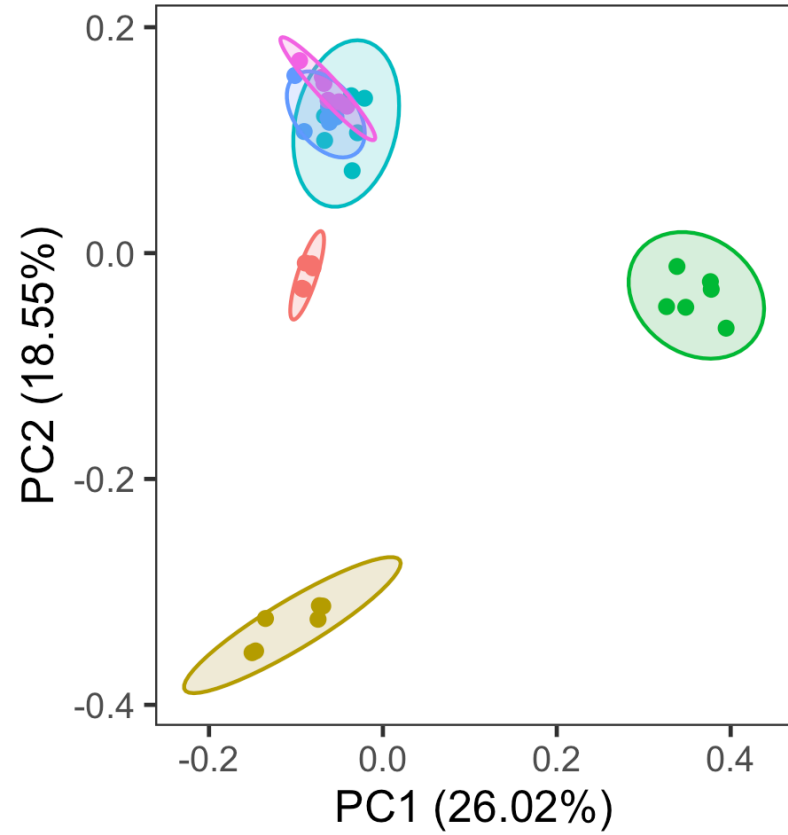

### B. *D. dianthicola* ME23

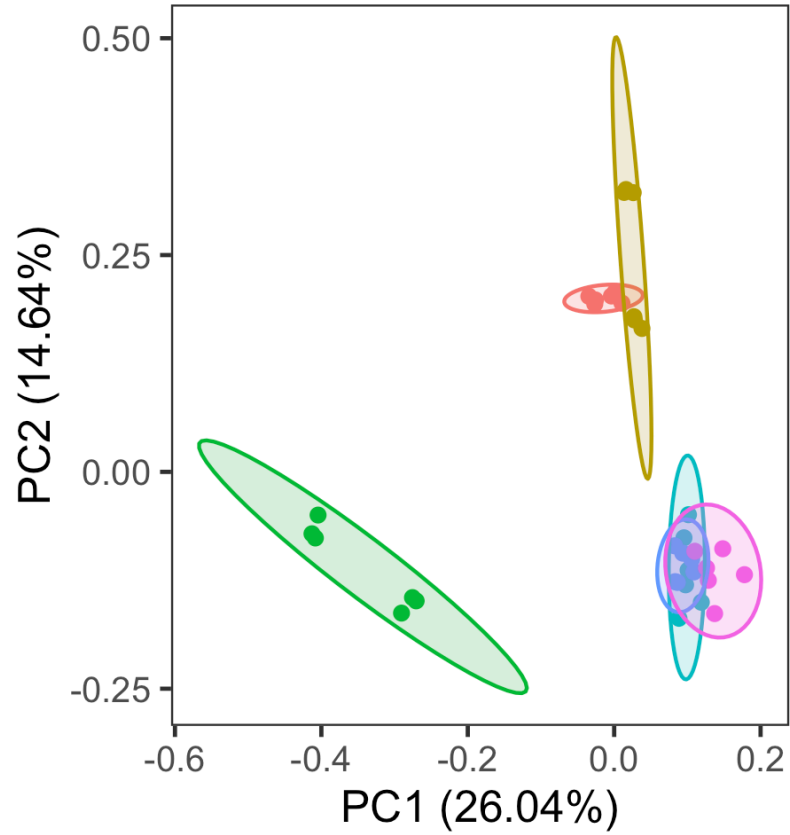

### C. *D. dianthicola* 67-19

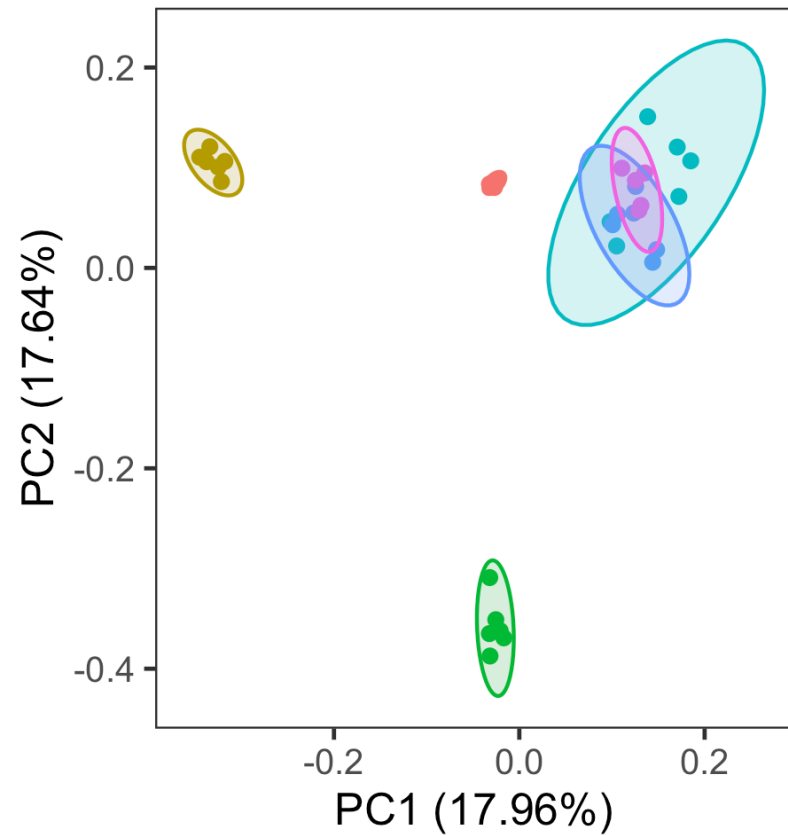

#### Treatment

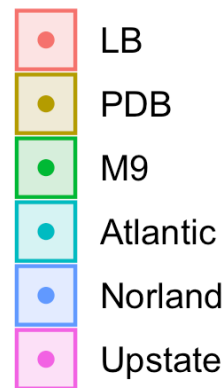

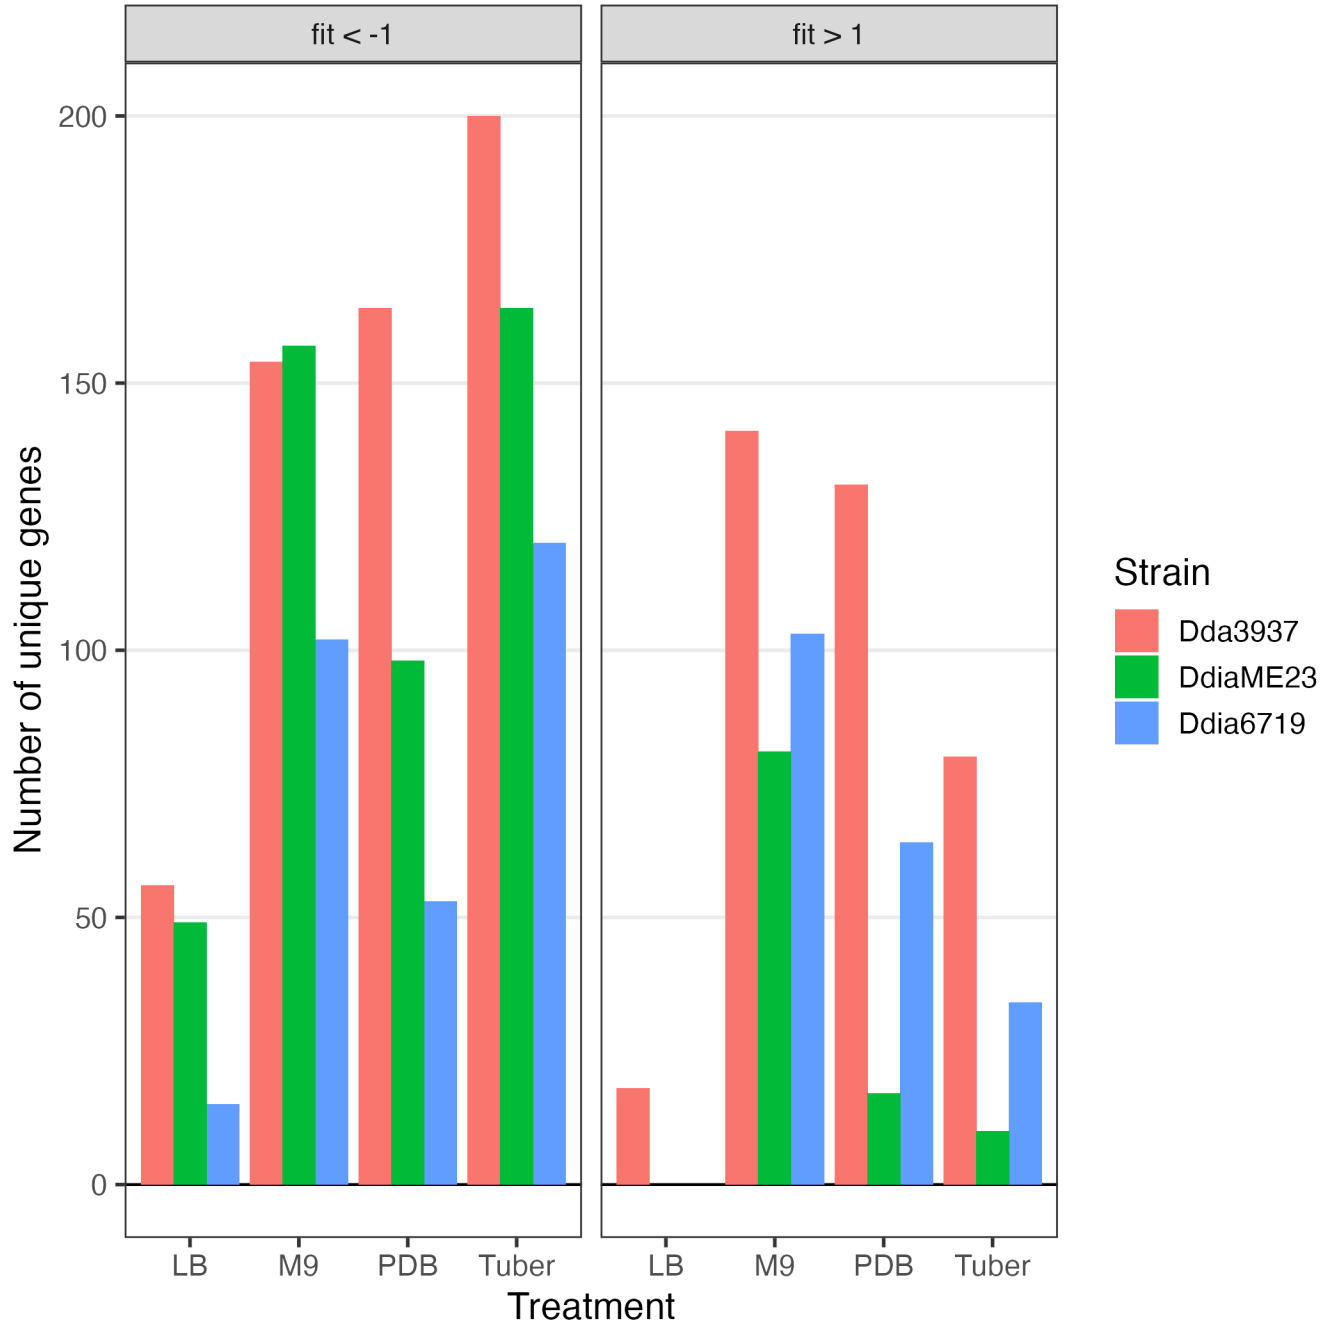

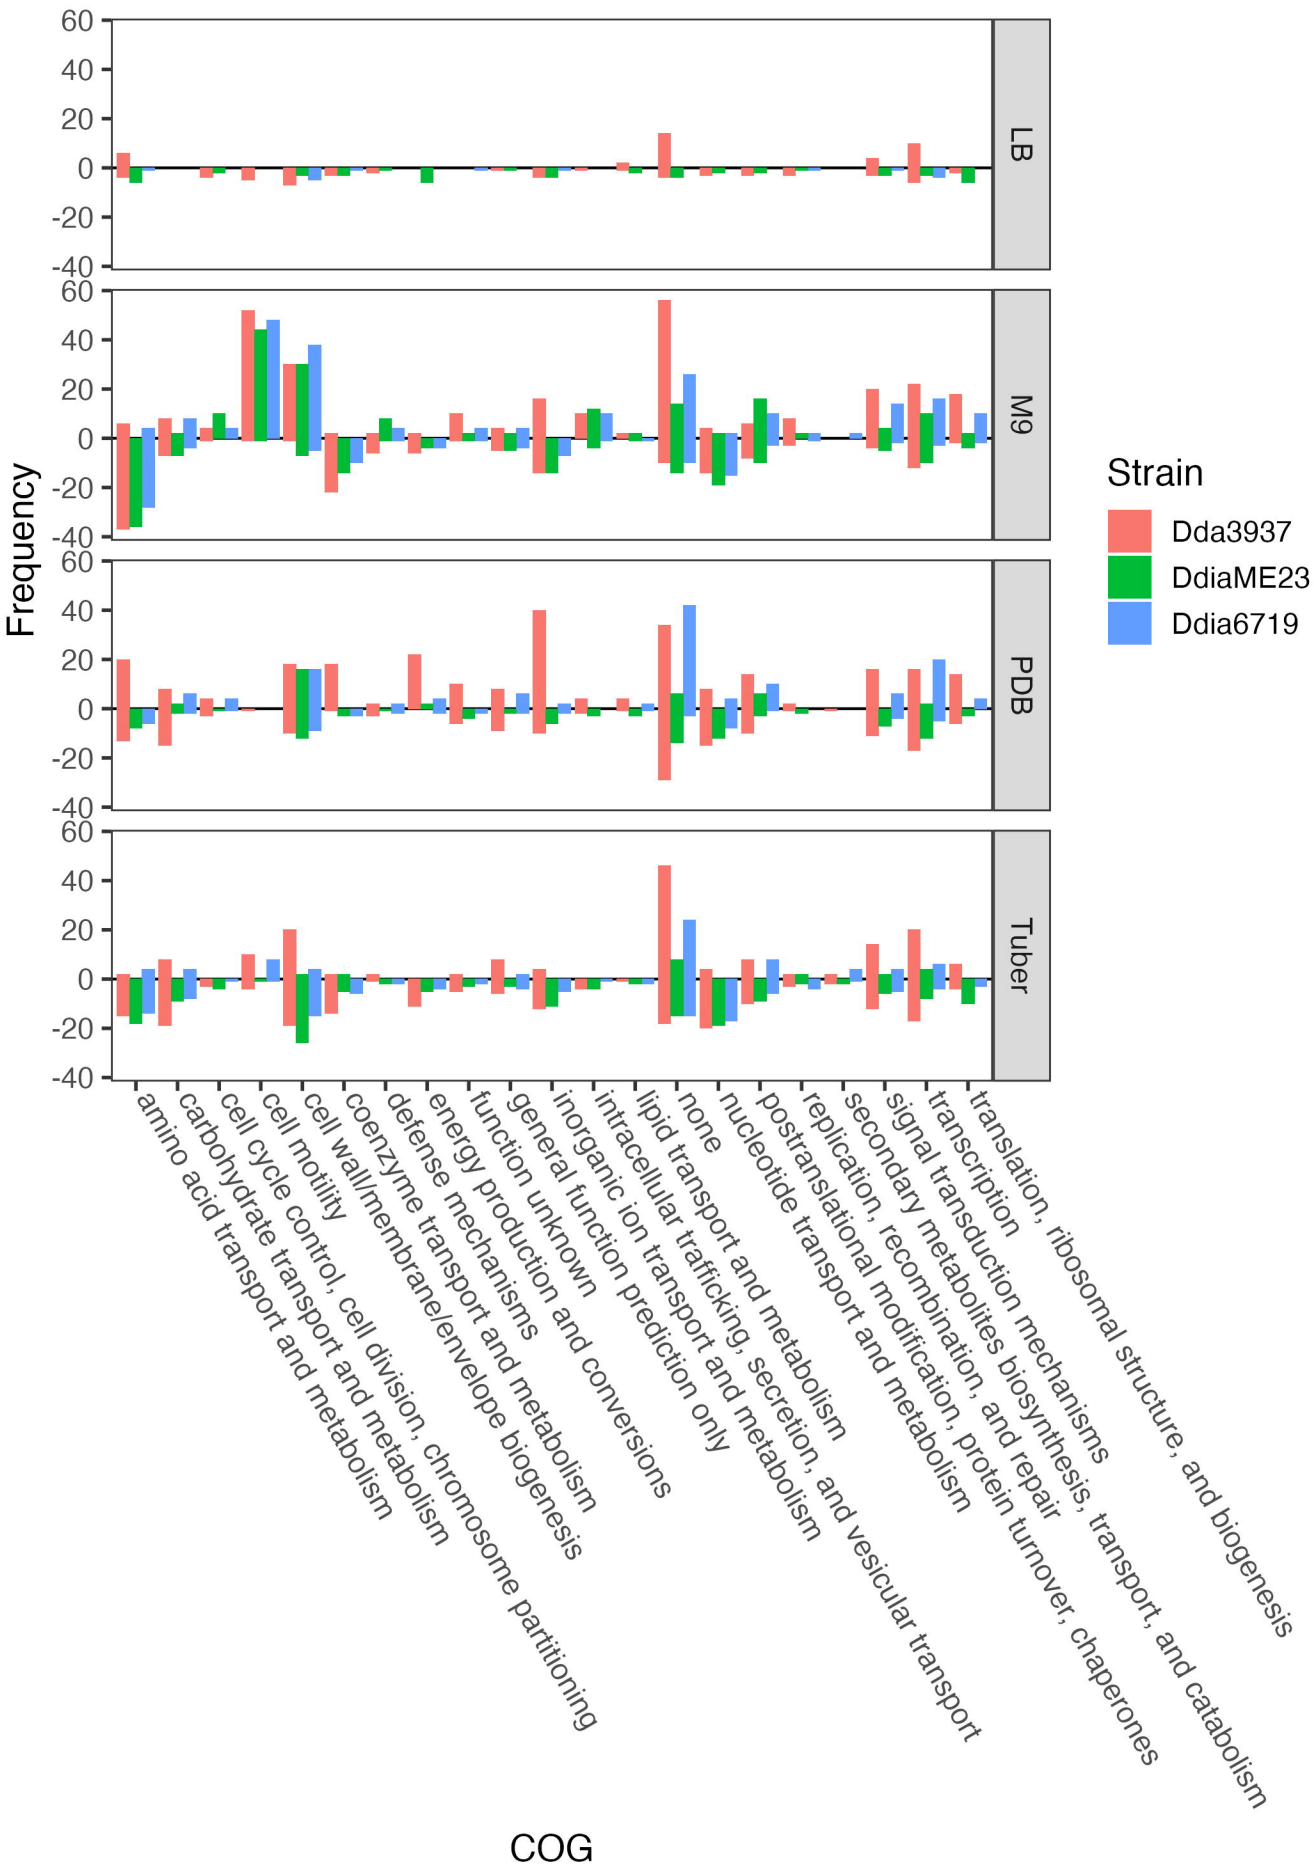

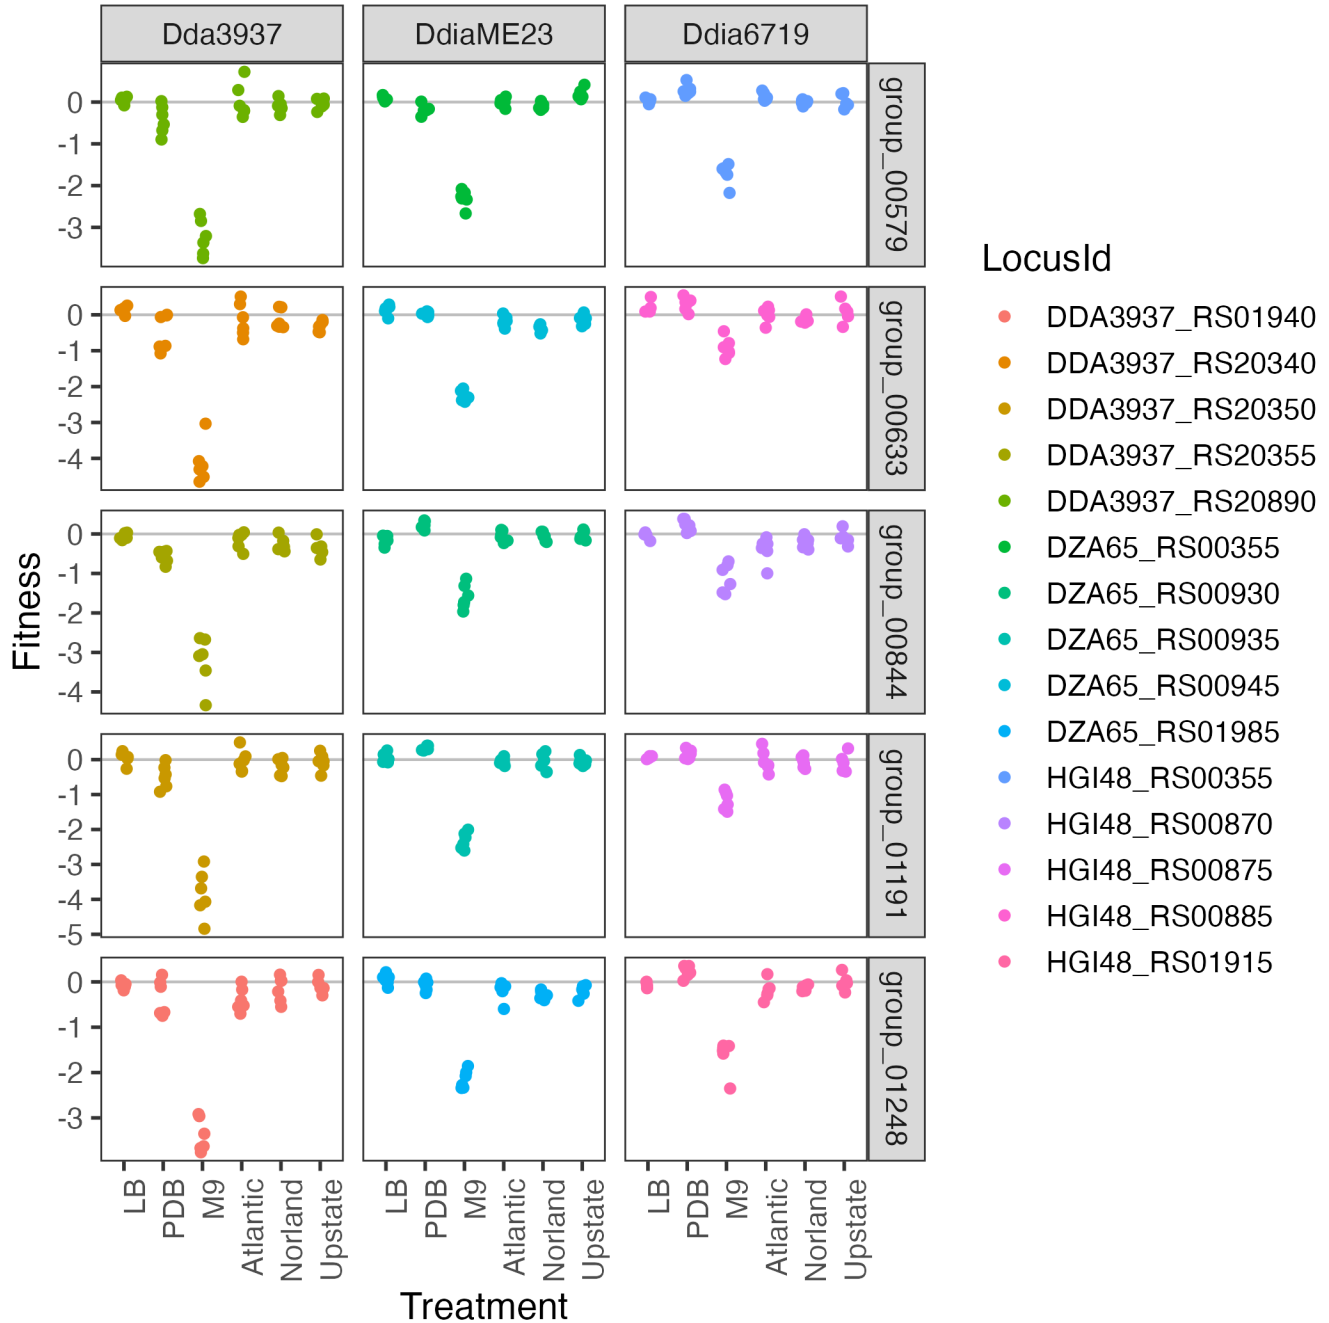

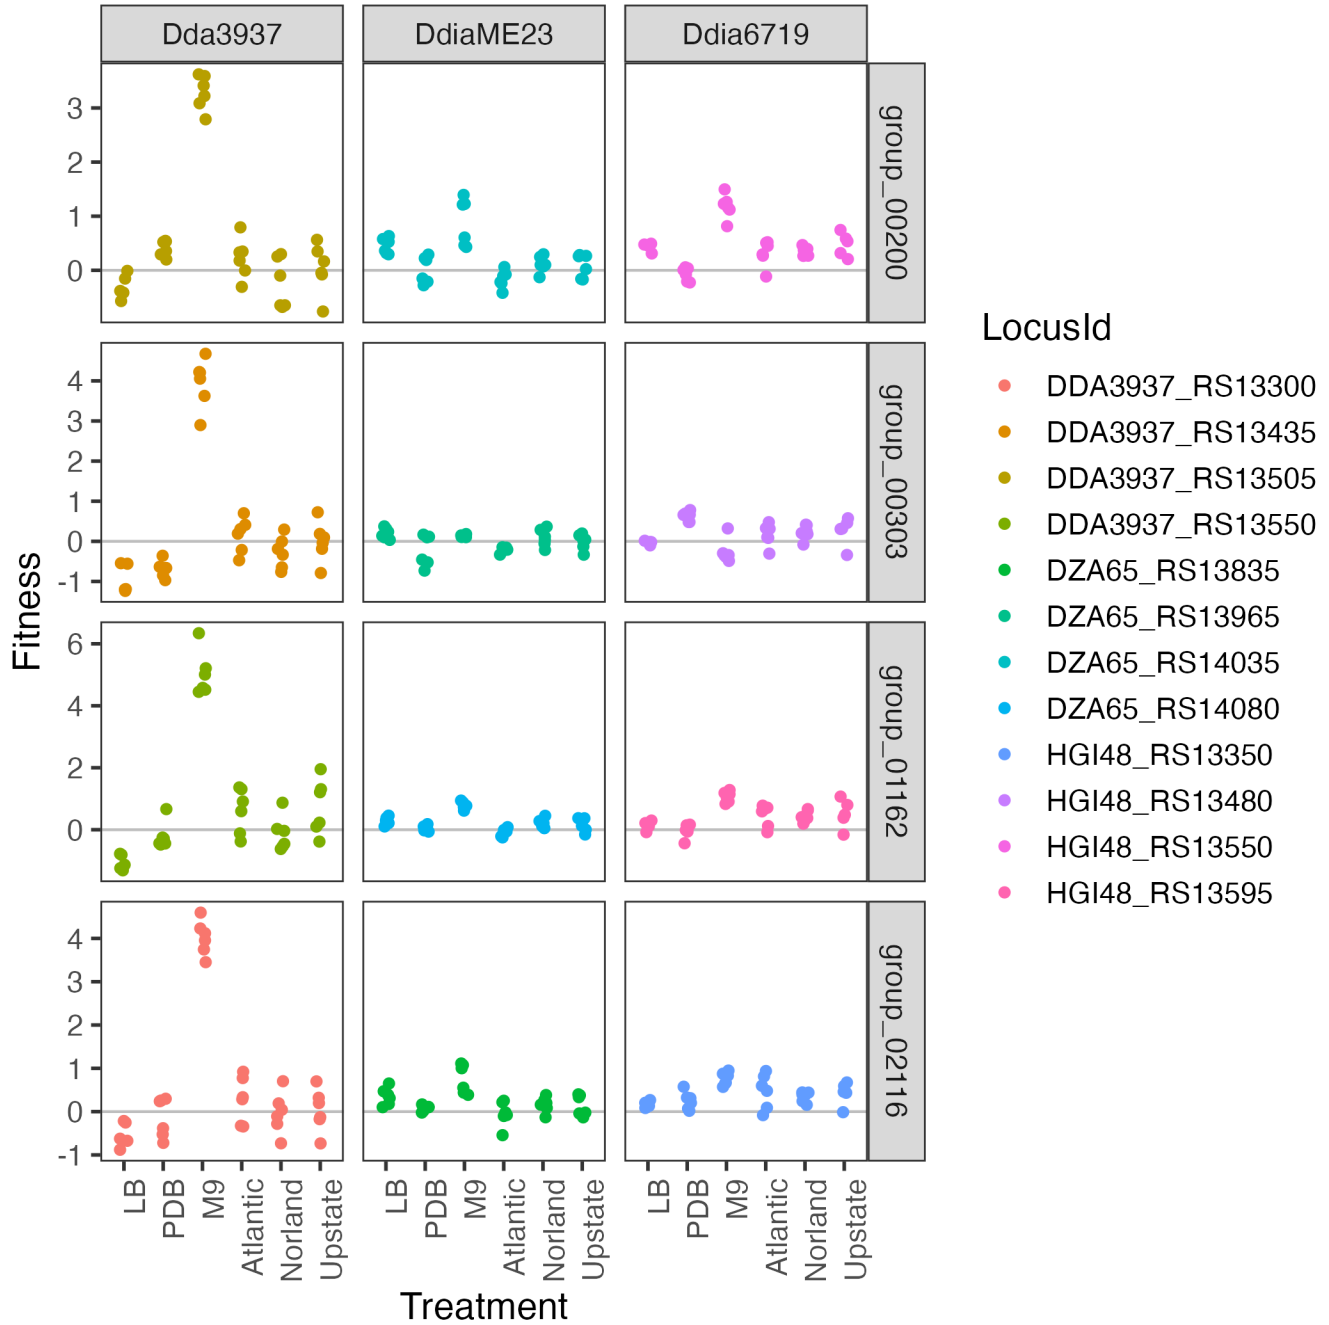

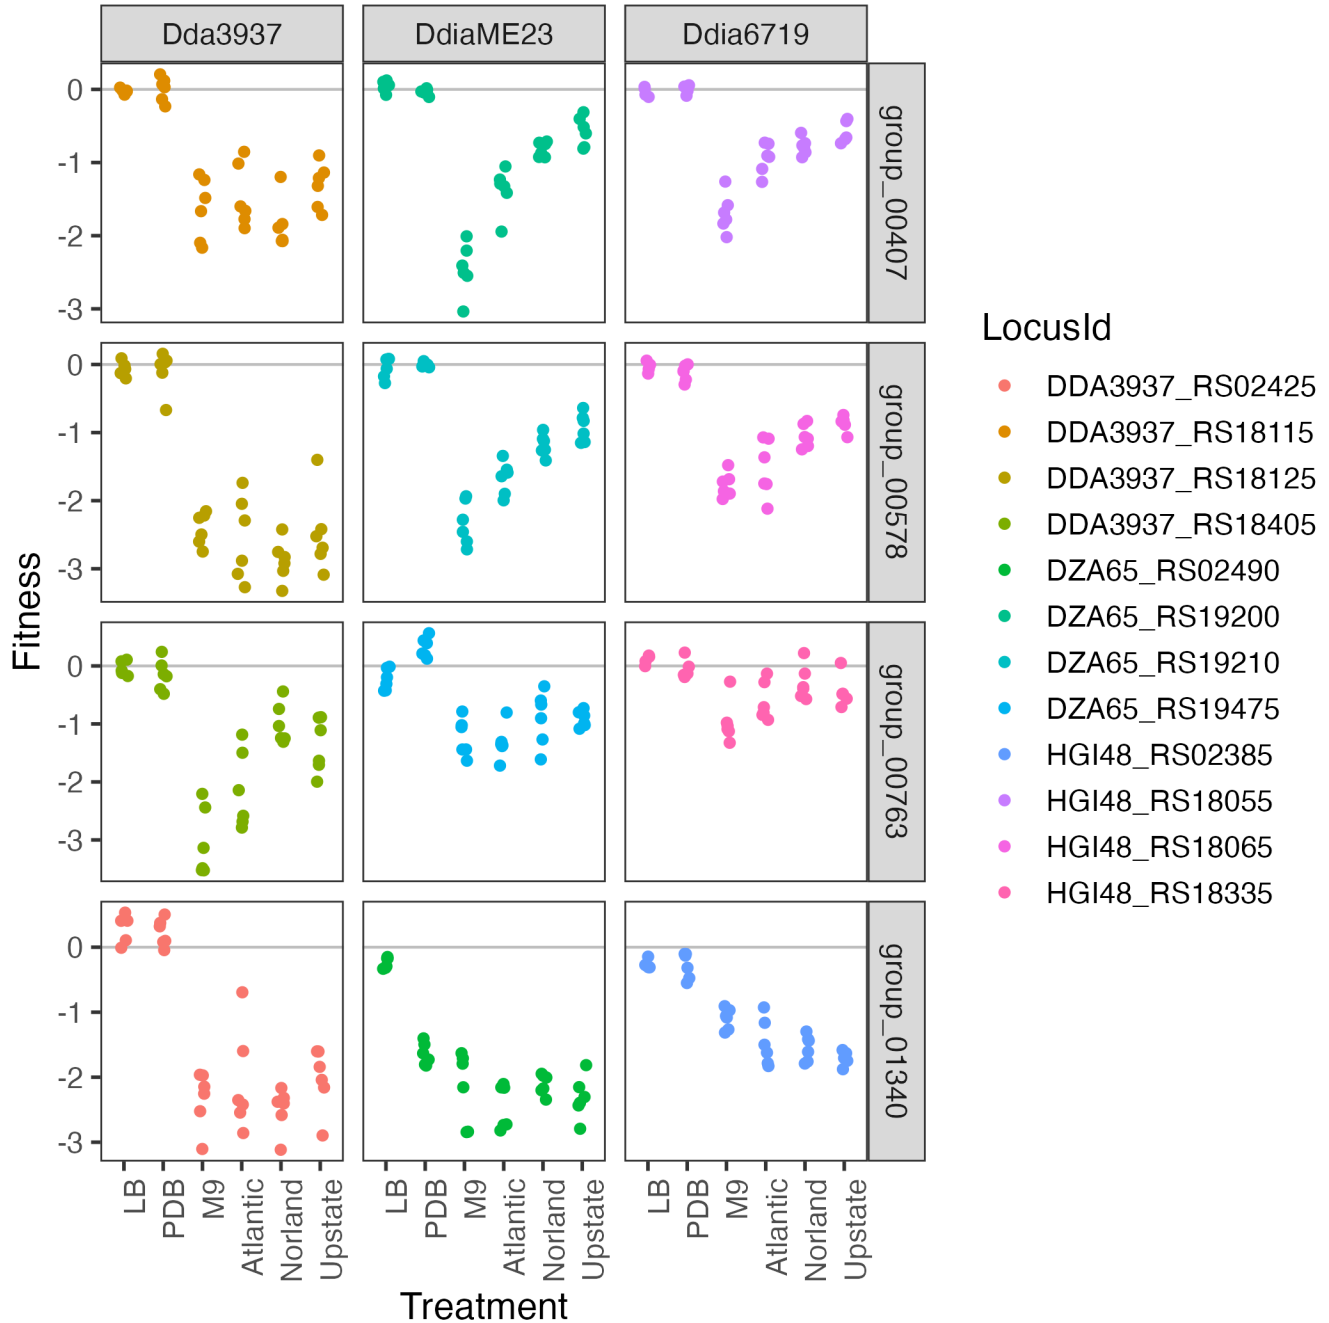

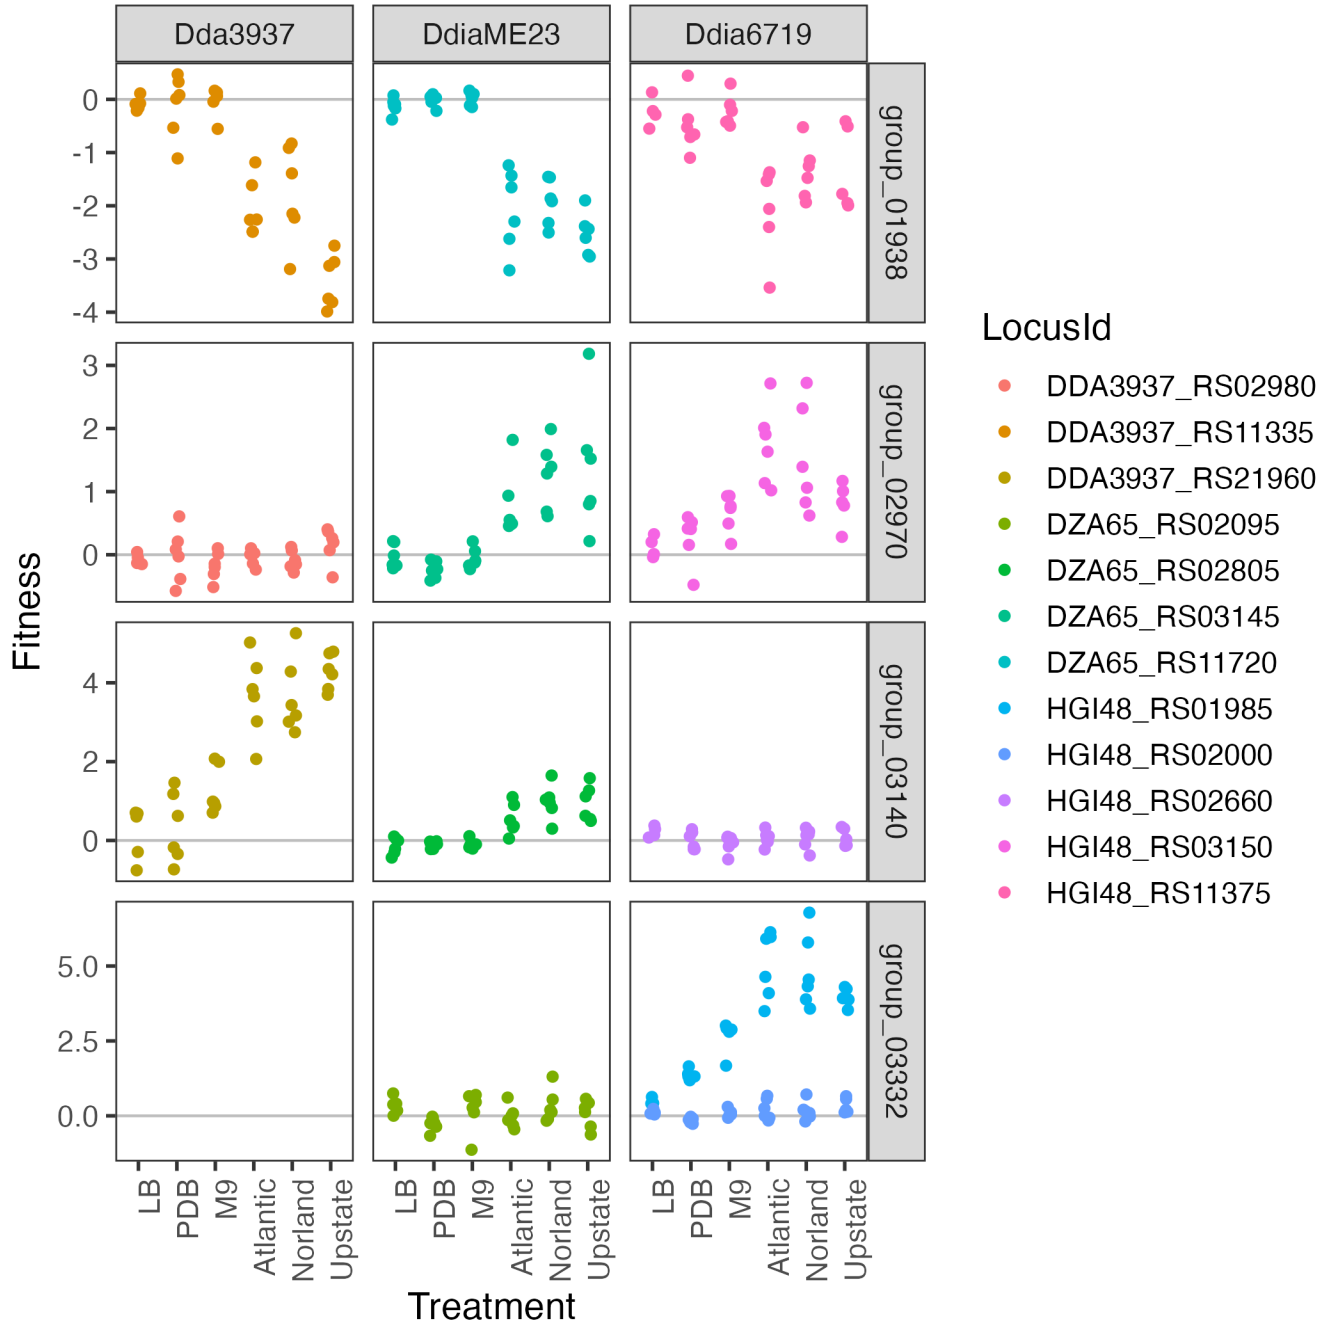

Source: https://www.biorxiv.org/content/10.1101/2021.09.16.460530v1.full.pdf
